# Supplementary material for: TiO2 Nanobelt@Co9S8 Composites as Promising Anode Materials for Lithium and Sodium Ion Batteries
Source: MDPI journal article supplement (doi:10.3390/nano7090252), 2017-09-02
Supplement: s1 [file s1]

# Supporting information

## TiO<sub>2</sub> Nanobelt@Co<sub>9</sub>S<sub>8</sub> Composites as Promising Anode Materials for Lithium and Sodium Ion Batteries

Yanli Zhou<sup>1</sup>, Qian Zhu<sup>2</sup>, Jian Tian<sup>3,\*</sup> and Fuyi Jiang<sup>1,\*</sup>

<sup>1</sup> School of Environmental and Material Engineering, Yantai University, Yantai 264005, China; zhouyanli@ytu.edu.cn (Y.Z.)

<sup>2</sup> Key Laboratory of Colloid and Interface Chemistry, Ministry of Education School of Chemistry and Chemical Engineering, Shandong University, Jinan 250100, China; 879391733@163.com (Q.Z.)

<sup>3</sup> School of Materials Science and Engineering, Shandong University of Science and Technology, Qingdao 266590, China

\* Correspondence: fyjiang@ytu.edu.cn (F.J.); jiantian@sdust.edu.cn (J.T.); Tel: 0535-6706039 (F.J.); 0532-86057929 (J.T.); Fax: 0535-6706038 (F.J.); 0532-86057929 (J.T.)

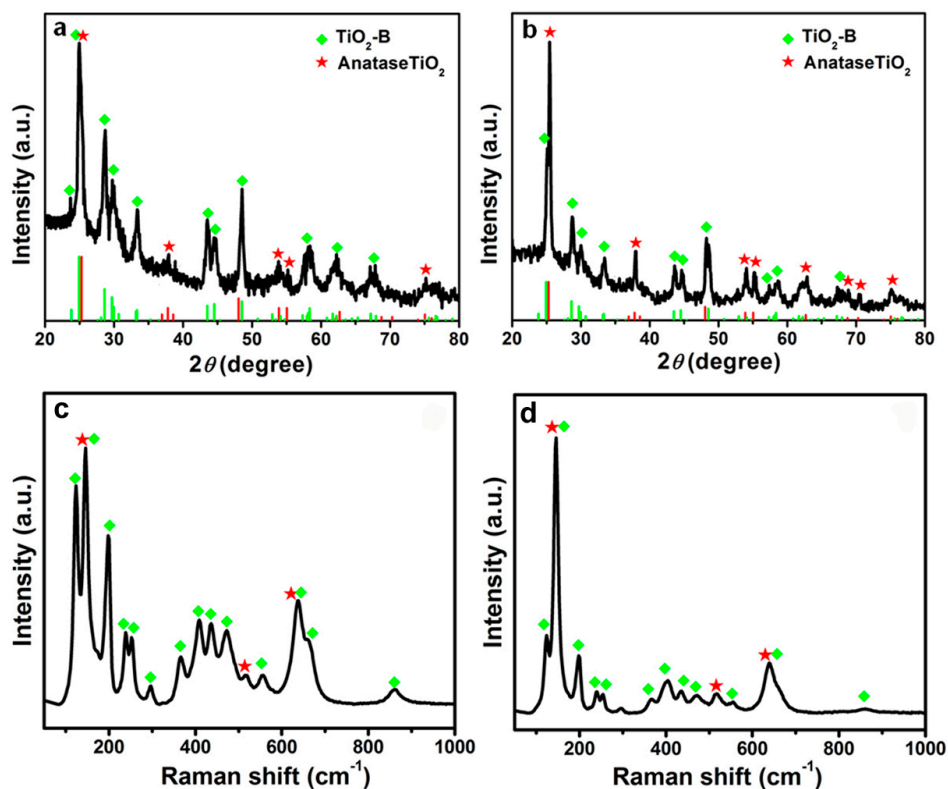

**Figure S1.** XRD patterns and Raman spectra of (a) and (c) as-prepared TiO<sub>2</sub> nanobelts and (b) and (d) TiO<sub>2</sub> nanobelts obtained by a heat treatment of 650 °C under Ar/H<sub>2</sub> atmosphere, respectively.

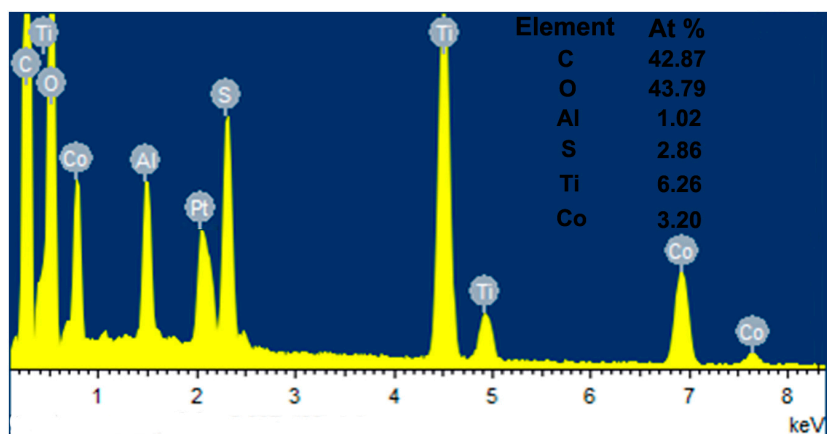

**Figure S2.** EDS spectrum of the as-prepared TiO<sub>2</sub> nanobelt@Co<sub>9</sub>S<sub>8</sub> composites (the inset is the molar ratio of element Ti, Co and S, respectively).

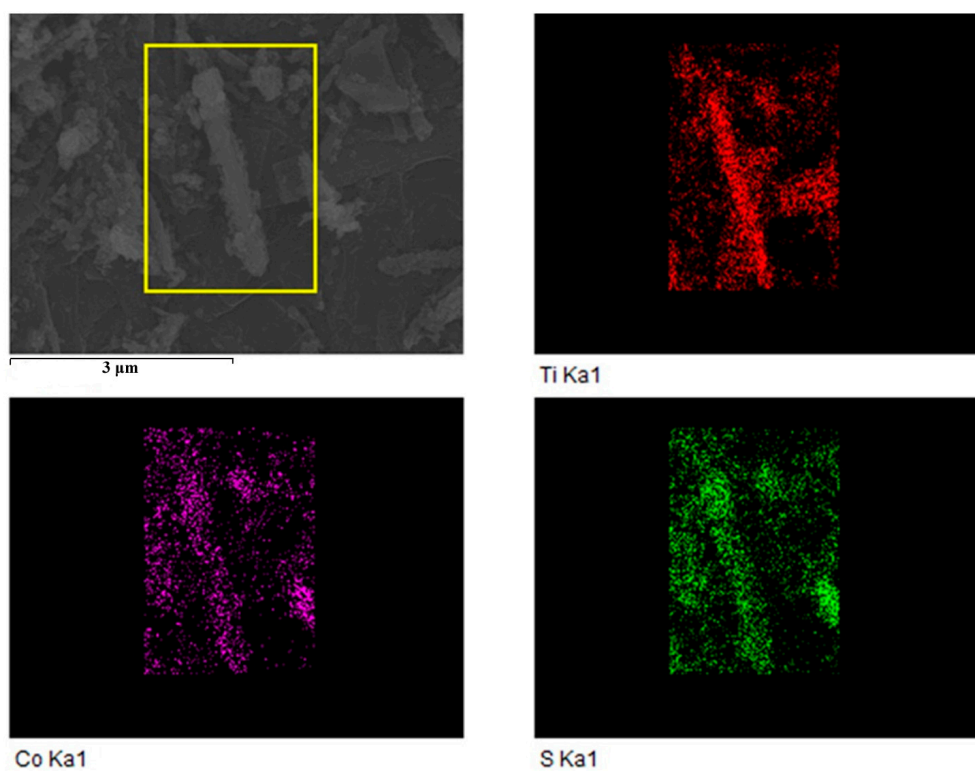

**Figure S3.** SEM image corresponding to EDS elemental mapping of Ti, Co and S of as-prepared TiO<sub>2</sub> nanobelt@Co<sub>9</sub>S<sub>8</sub> composites.

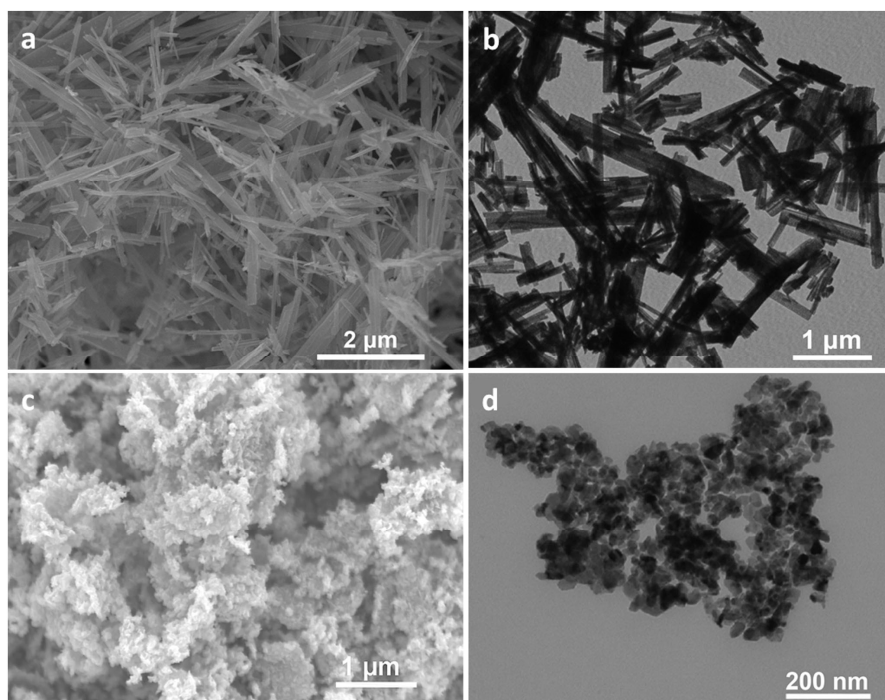

**Figure S4.** SEM images (a) and (c), TEM images (b) and (d) of TiO<sub>2</sub> nanobelts and Co<sub>9</sub>S<sub>8</sub> nanoparticles, respectively.

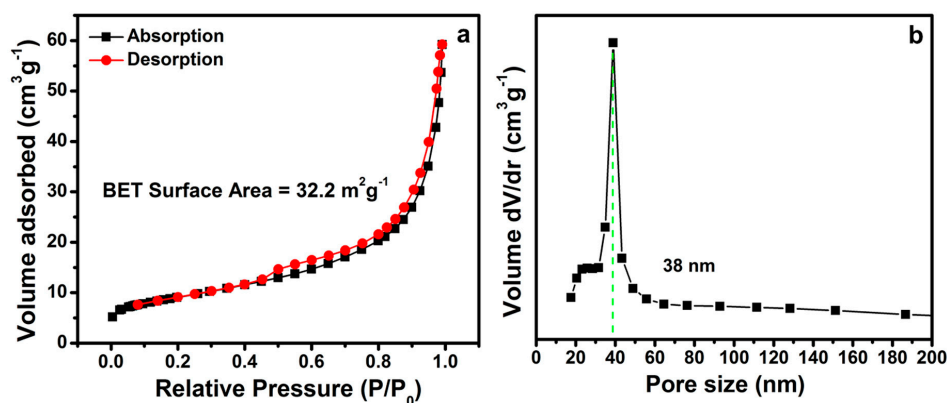

**Figure S5.** Nitrogen adsorption-desorption isotherm (a) and pore size distribution (b) of TiO<sub>2</sub> nanobelt@Co<sub>9</sub>S<sub>8</sub> composites at 77.3 K.

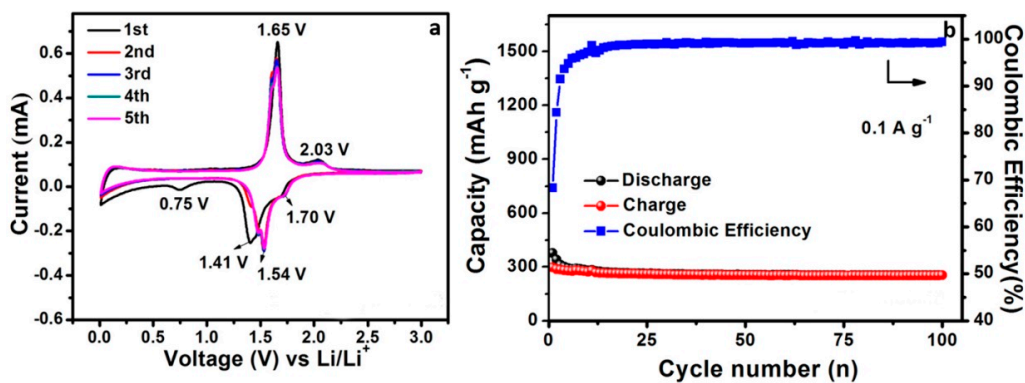

**Figure S6.** CV curves (a) of TiO<sub>2</sub> nanobelts for the first five cycles at a scan rate of 0.1 mV s<sup>-1</sup> and cycling performances (b) of TiO<sub>2</sub> nanobelts at 0.1 A·g<sup>-1</sup>.

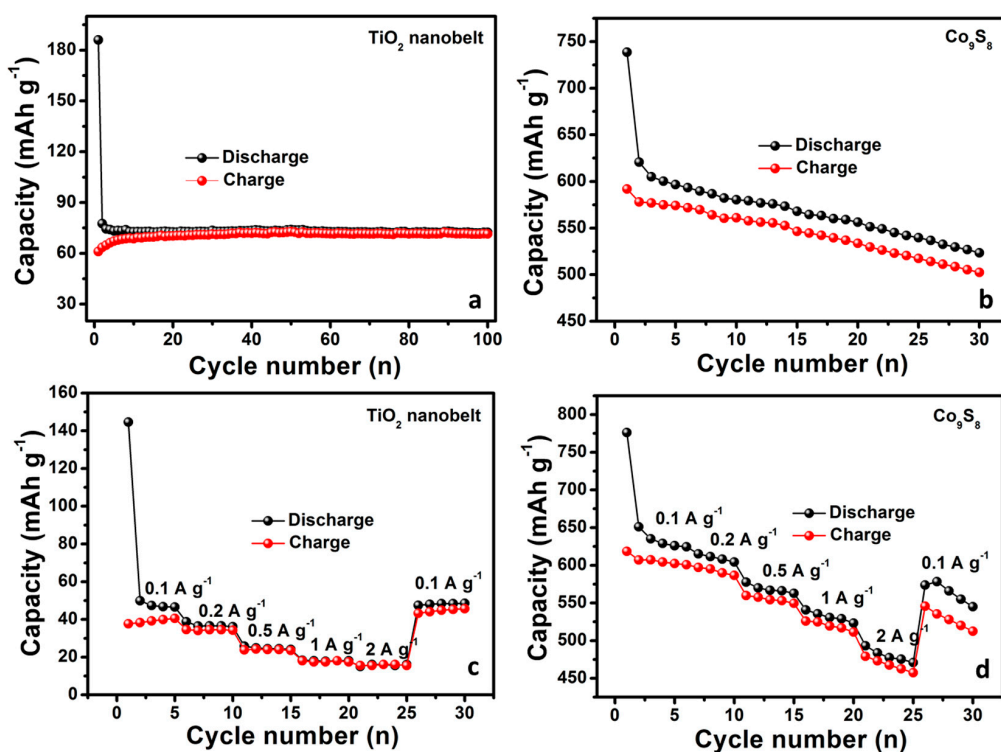

**Figure S7.** Cycling performances (a) and (b) at 0.1 A g<sup>-1</sup>, rate capacities (c) and (d) at different current densities of TiO<sub>2</sub> nanobelts and Co<sub>9</sub>S<sub>8</sub> nanoparticles for SIBs.

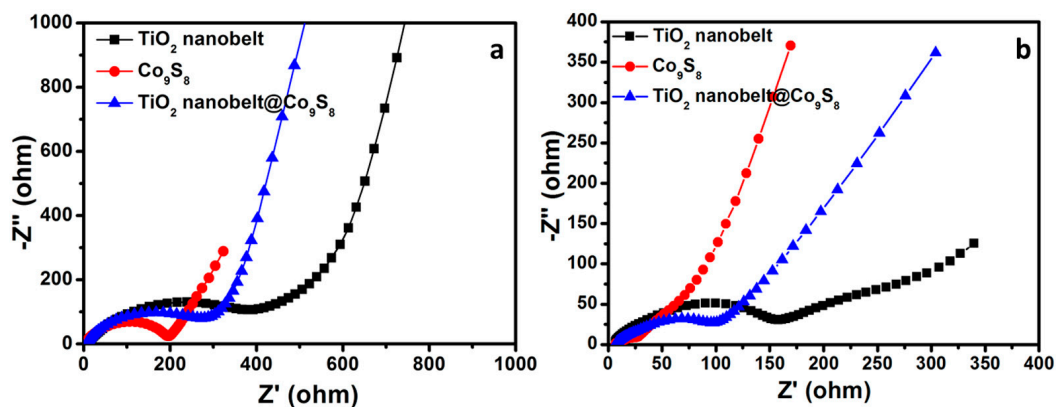

**Figure S8.** Electrochemical impedance spectra (EIS) of (a) before cycling and (b) after cycling 30 cycles of TiO<sub>2</sub> nanobelts, Co<sub>9</sub>S<sub>8</sub> nanoparticles and TiO<sub>2</sub> nanobelt@Co<sub>9</sub>S<sub>8</sub> composites.
